# Supplementary material for: JNK signaling provides a novel therapeutic target for Rett syndrome
Source: PubMed Central journal article supplement (PMC8675514; doi:10.1186/s12915-021-01190-2), 2021-12-16
Supplement: 12915_2021_1190_MOESM1_ESM.pdf [file 12915_2021_1190_MOESM1_ESM.pdf]

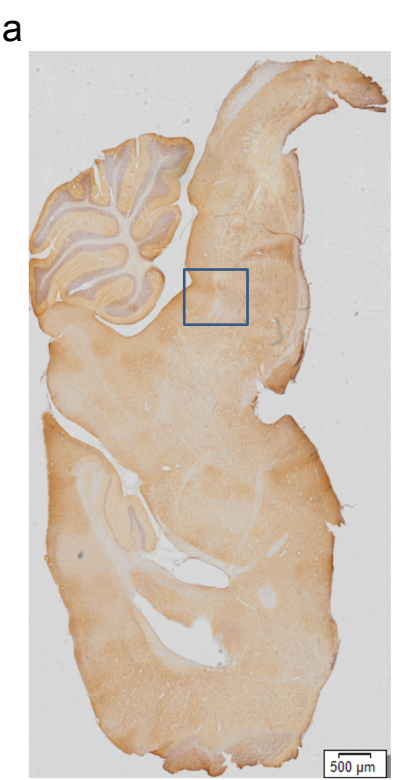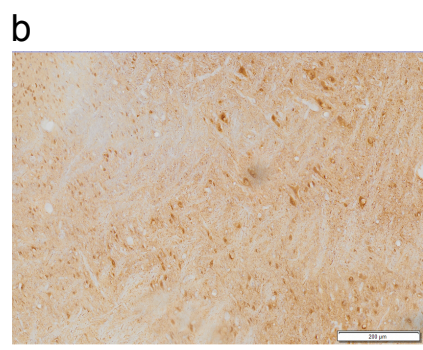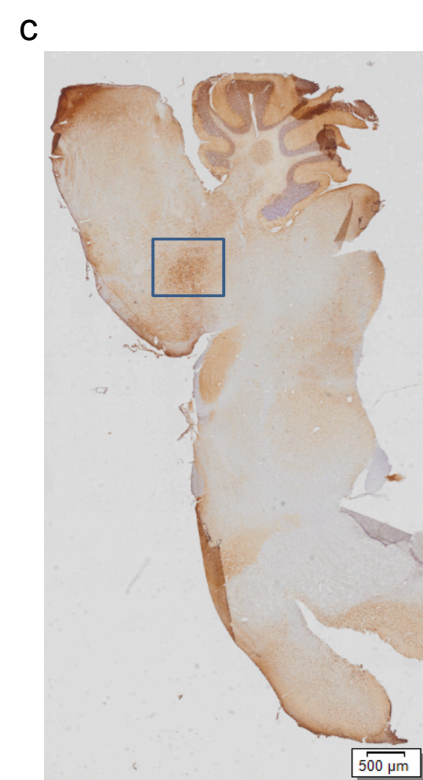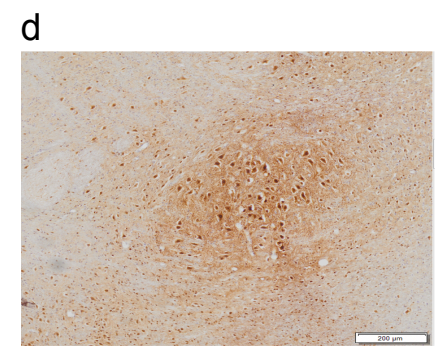

SUPPLEMENTARY FIGURE 1
