# Supplementary material for: JNK signaling provides a novel therapeutic target for Rett syndrome
Source: PubMed Central journal article supplement (PMC8675514; doi:10.1186/s12915-021-01190-2), 2021-12-16
Supplement: 12915_2021_1190_MOESM2_ESM.pdf [file 12915_2021_1190_MOESM2_ESM.pdf]

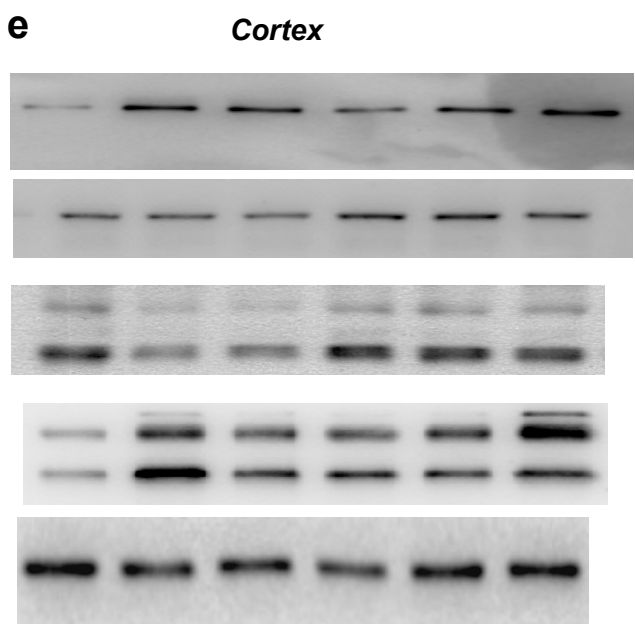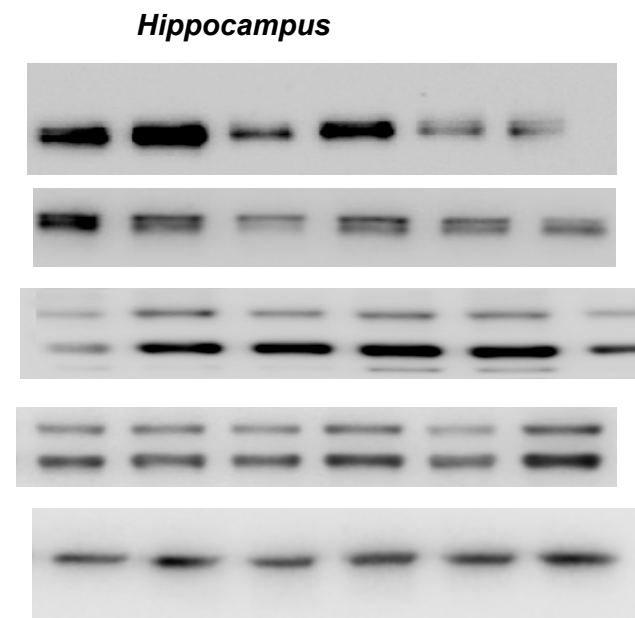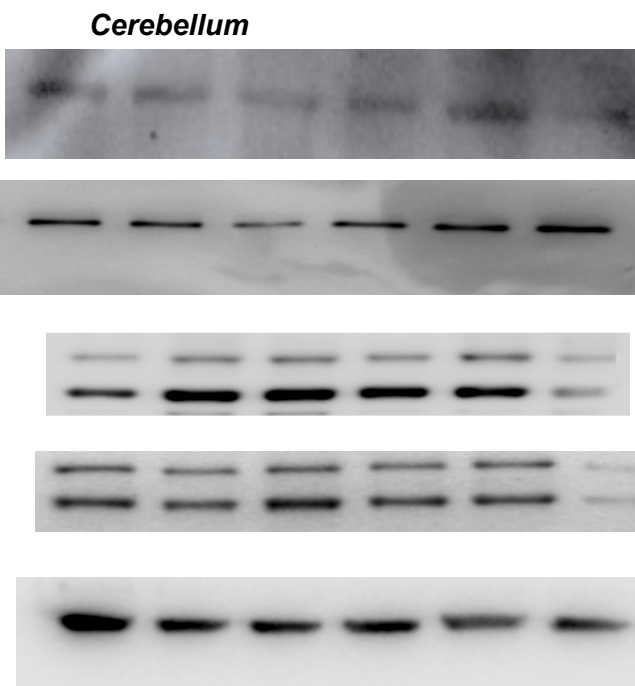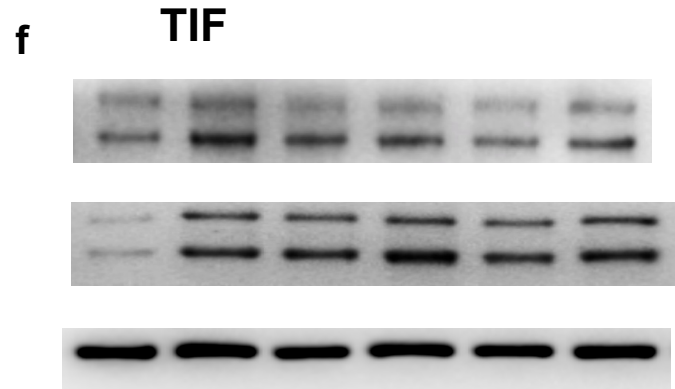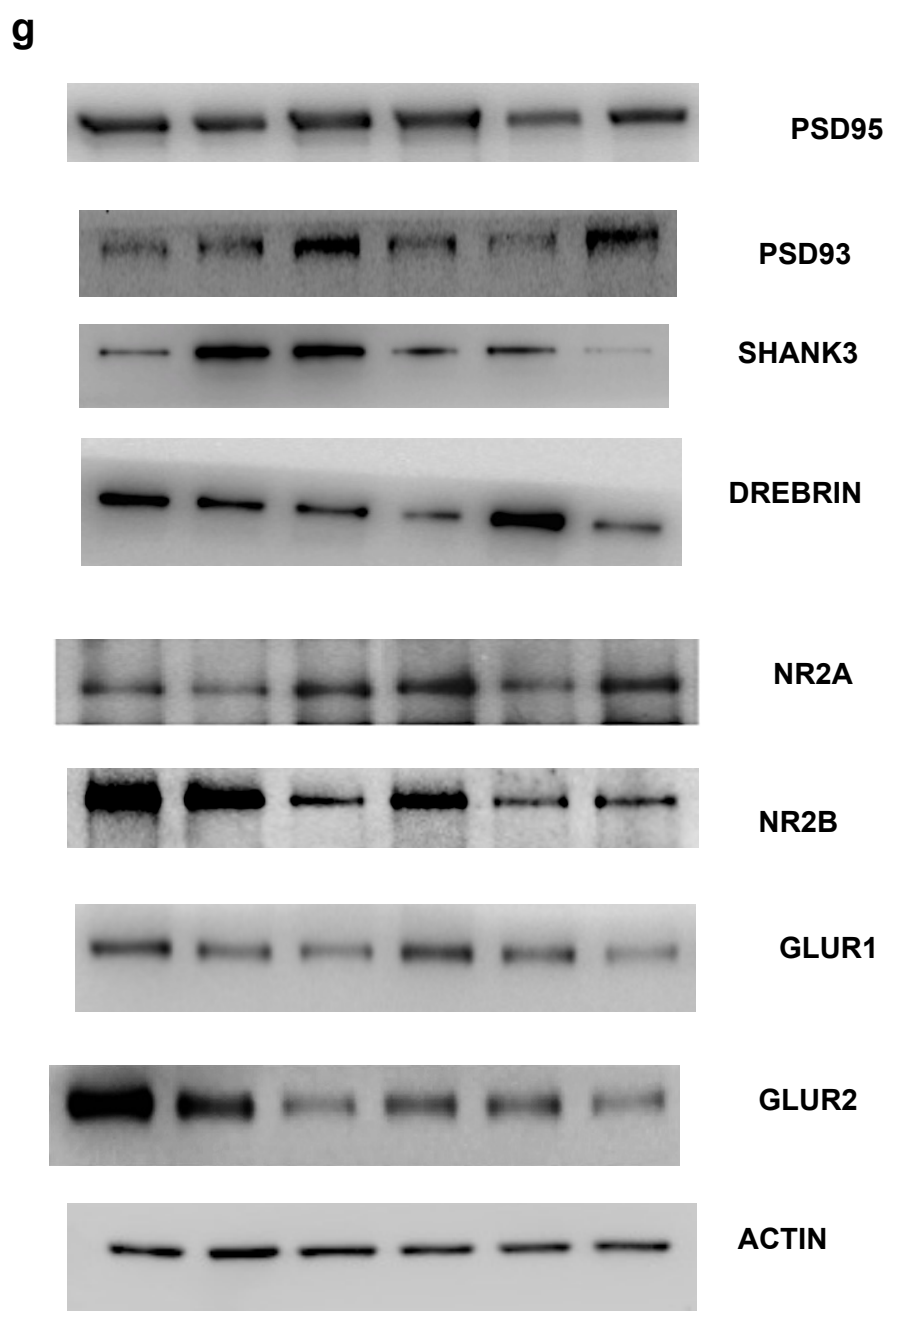

All membranes were cut in order to incubate at the same time different antibodies

**FIGURE 1**

**d Whole homogenates**

***Cortex***

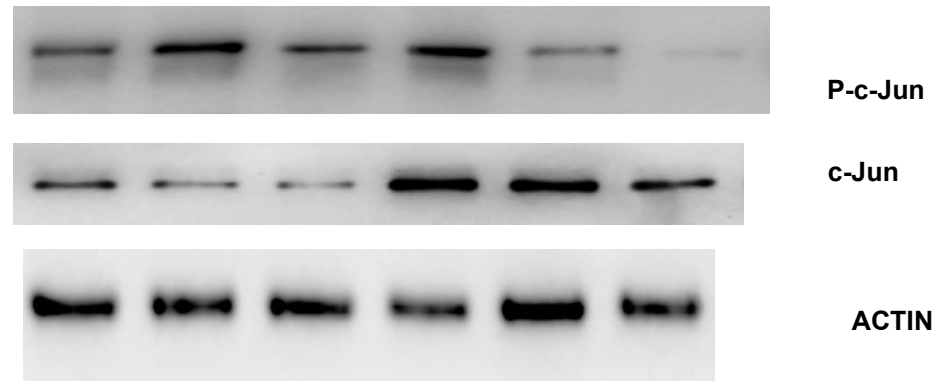

***Hippocampus***

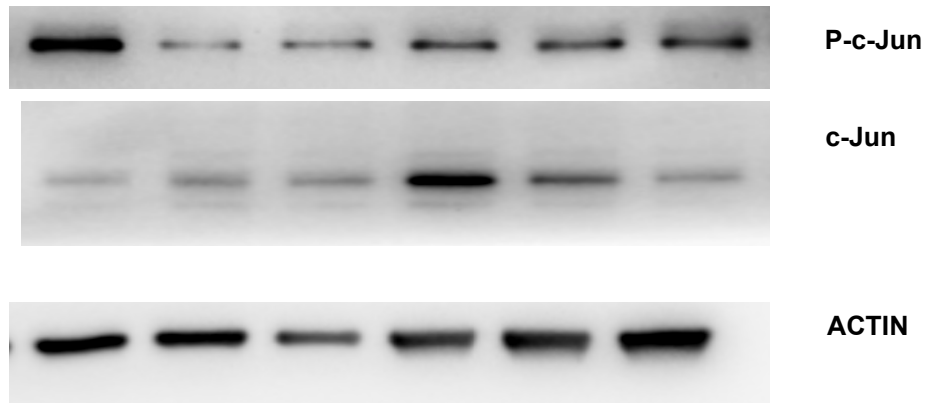

***Cerebellum***

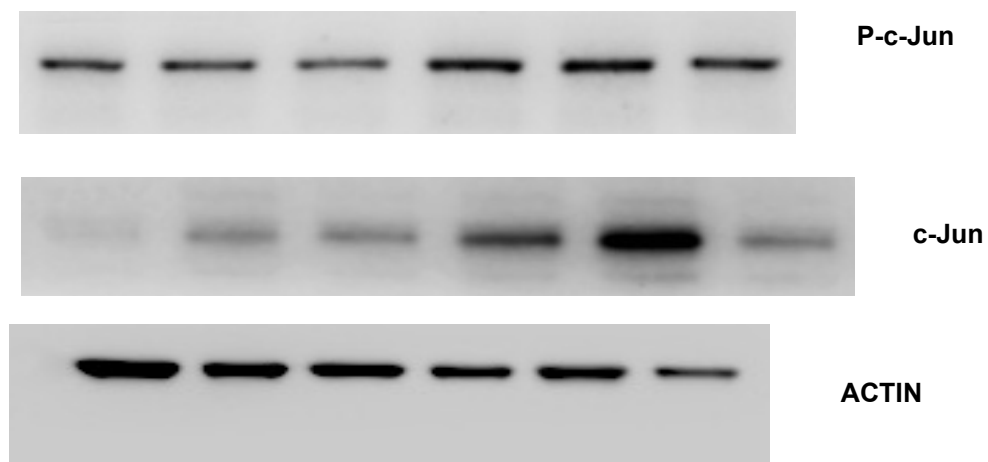

FIGURE 2

All membranes were cut in order to incubate at the same time different antibodies

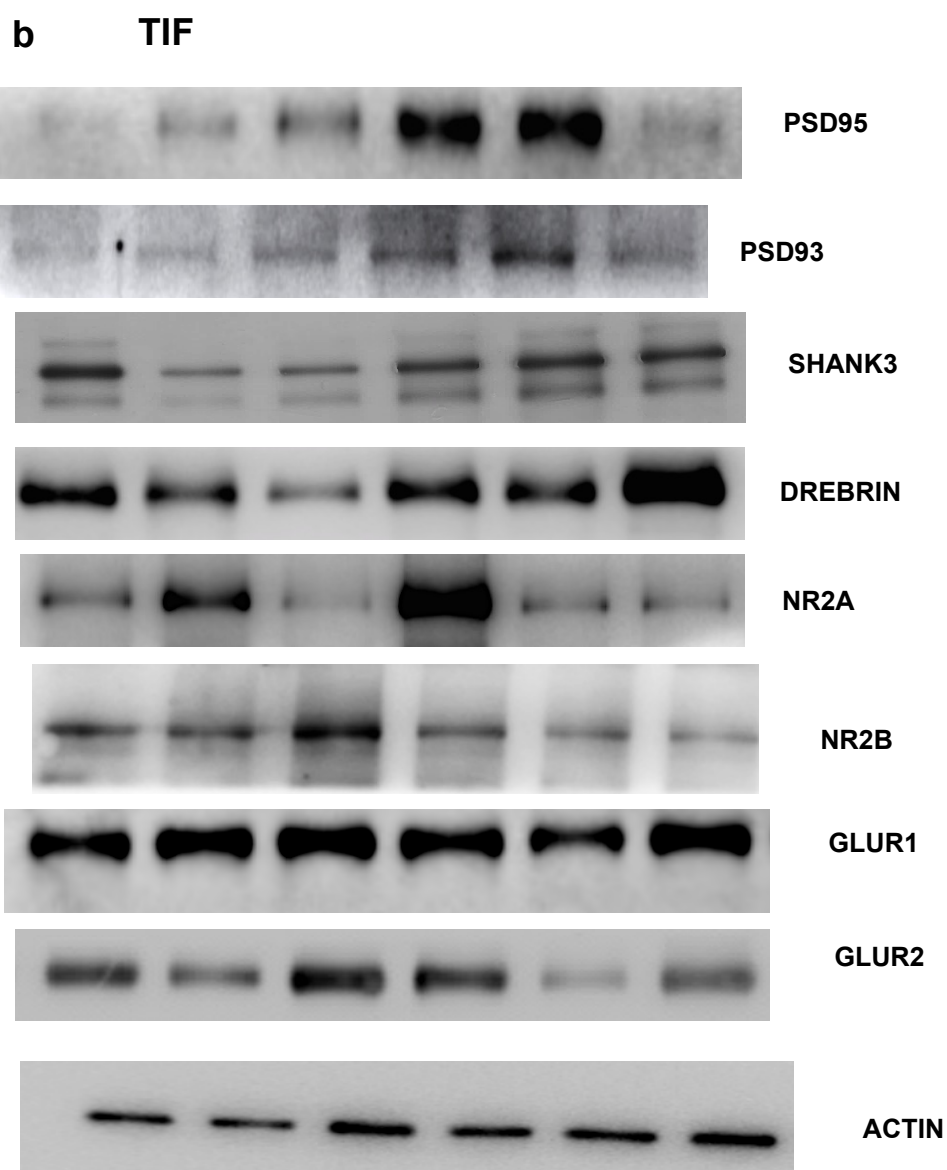

**a**

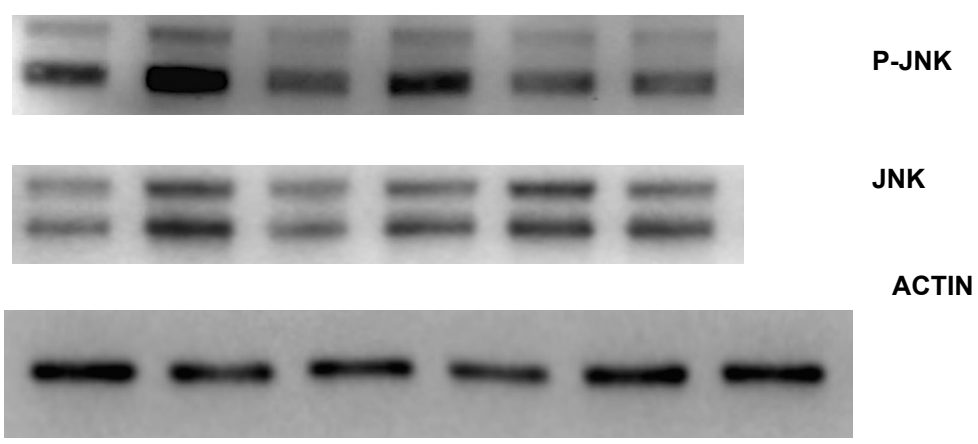

**FIGURE 3**

All membranes were cut in order to incubate at the same time different antibodies

**D****Cortex**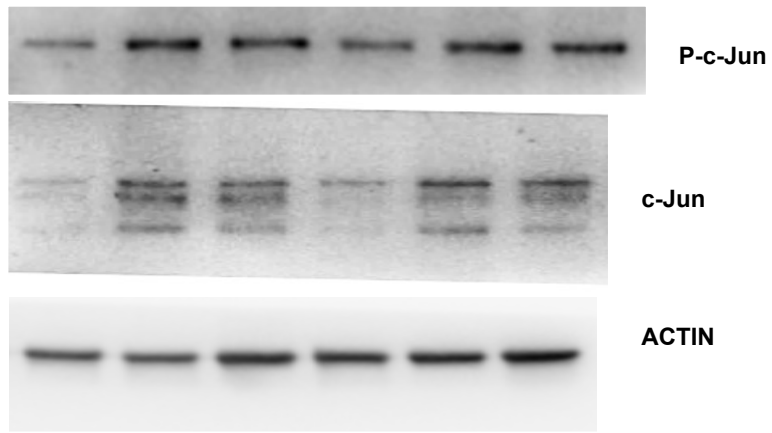**Hippocampus**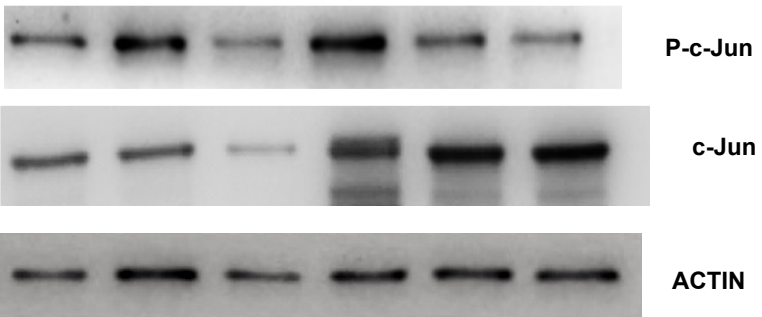**Cerebellum**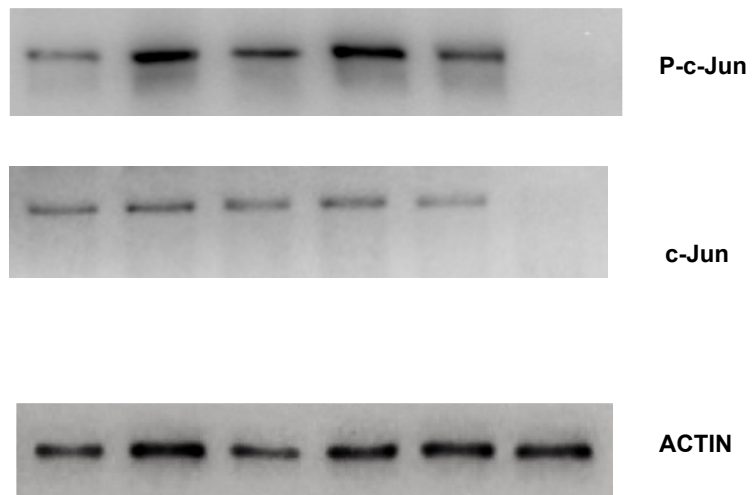**e**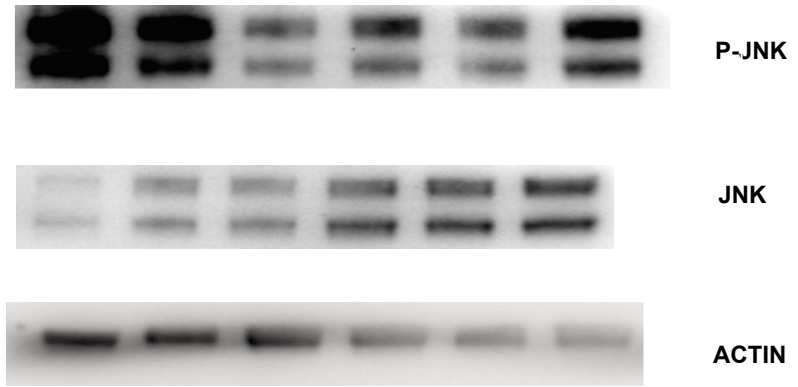**f**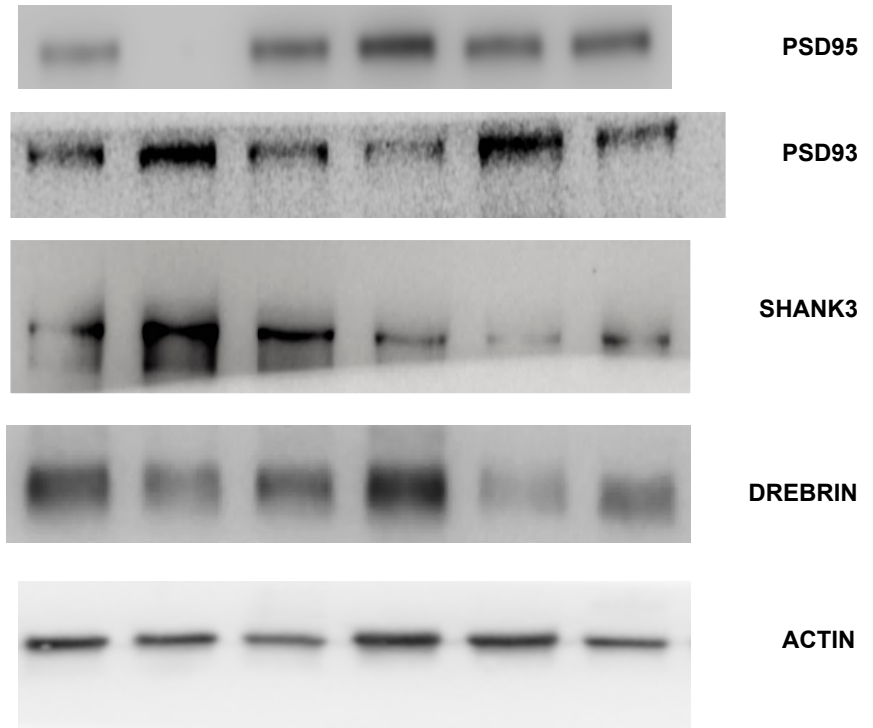

All membranes were cut in order to incubate at the same time different antibodies

**FIGURE 4**

**b**

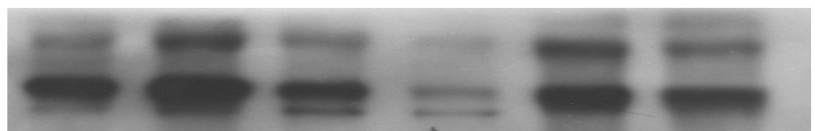

**P-JNK**

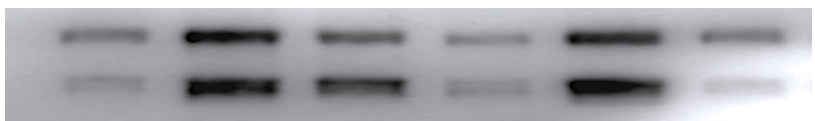

**JNK**

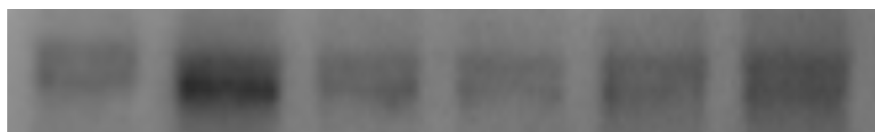

**P-c-Jun**

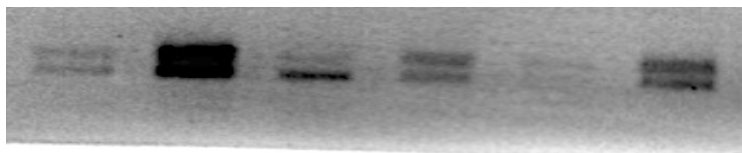

**c-Jun**

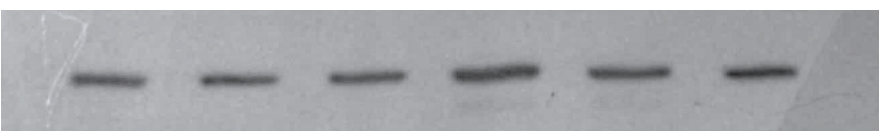

**ACTIN**

All membranes were cut in order to incubate at the same time different antibodies

**FIGURE 5**
